# Supplementary material for: Vascular structure and function and their relationship with health-related quality of life in the MARK study
Source: PubMed Central journal article supplement (PMC4865998; doi:10.1186/s12872-016-0272-9), 2016-05-12
Supplement: 12872_2016_272_MOESM1_ESM.pdf [file 12872_2016_272_MOESM1_ESM.pdf]

**Physical component summary (PCS-12) and Mental component summary (MCS-12).**

*The calculation of physical and mental component was carried out as detailed below:*

**Step 1:**

COMPUTE AGG\_PHYS = (PF\_Z \* 0.42402) + (RP\_Z \* 0.35119) + (BP\_Z \* 0.31754) + (GH\_Z \* 0.24954) + (VT\_Z \* 0.02877) + (SF\_Z \* -0.00753) + (RE\_Z \* -0.19206) + (MH\_Z \* -0.22069).

COMPUTE AGG\_MENT = (PF\_Z \* -0.22999) + (RP\_Z \* -0.12329) + (BP\_Z \* -0.09731) + (GH\_Z \* -0.01571) + (VT\_Z \* 0.23534) + (SF\_Z \* 0.26876) + (RE\_Z \* 0.43407) + (MH\_Z \* 0.48581).

**Step 2:**

COMPUTE PCS\_US = 50 + (AGG\_PHYS \* 10).

COMPUTE MCS\_US = 50 + (AGG\_MENT \* 10).
