# Supplementary material for: Vascular structure and function and their relationship with health-related quality of life in the MARK study
Source: PubMed Central journal article supplement (PMC4865998; doi:10.1186/s12872-016-0272-9), 2016-05-12
Supplement: 12872_2016_272_MOESM2_ESM.pdf [file 12872_2016_272_MOESM2_ESM.pdf]

**Table S2: Multiple linear regression analysis of vascular structure and function parameters and health-related quality of life.**

| a)                                   | Model 1: Unadjusted |        |       |        | Model 2: Minimally adjusted |        |       |        | Model 3: Fully adjusted |        |       |        |
|--------------------------------------|---------------------|--------|-------|--------|-----------------------------|--------|-------|--------|-------------------------|--------|-------|--------|
|                                      | B                   | CI95%  |       | p      | B                           | CI95%  |       | p      | B                       | CI95%  |       | p      |
| <b>ABI</b>                           |                     |        |       |        |                             |        |       |        |                         |        |       |        |
| STANDARDIZED PHYSICAL FUNCTION       | 29.42               | 16.11  | 42.73 | <0.001 | 25.61                       | 11.70  | 39.51 | <0.001 | 26.22                   | 11.68  | 40.75 | <0.001 |
| STANDARDIZED ROLE PHYSICAL           | 15.92               | 1.99   | 29.85 | 0.025  | 9.55                        | -4.92  | 24.02 | 0.195  | 10.60                   | -4.48  | 25.69 | 0.167  |
| STANDARDIZED BODILY PAIN             | 21.82               | 4.18   | 39.46 | 0.015  | 8.05                        | -9.79  | 25.89 | 0.375  | 11.25                   | -7.99  | 30.49 | 0.251  |
| STANDARDIZED GENERAL HEALTH          | 12.98               | -0.63  | 26.60 | 0.061  | 9.76                        | -4.45  | 23.98 | 0.178  | 8.37                    | -6.59  | 23.32 | 0.272  |
| STANDARDIZED VITALITY                | 13.29               | -3.76  | 30.34 | 0.126  | 9.08                        | -8.81  | 26.96 | 0.319  | 6.60                    | -12.02 | 25.22 | 0.486  |
| STANDARDIZED SOCIAL FUNCTIONING      | 1.02                | -13.93 | 15.97 | 0.893  | -7.87                       | -23.16 | 7.43  | 0.312  | -12.94                  | -29.26 | 3.37  | 0.120  |
| STANDARDIZED ROLE EMOTIONAL          | 4.72                | -10.16 | 19.59 | 0.533  | -3.49                       | -18.83 | 11.85 | 0.655  | -8.32                   | -24.71 | 8.06  | 0.318  |
| STANDARDIZED MENTAL HEALTH           | 14.69               | -1.26  | 30.63 | 0.071  | 1.79                        | -14.21 | 17.79 | 0.826  | -6.85                   | -23.60 | 9.90  | 0.422  |
| <b>STANDARDIZED PHYSICAL COMPON.</b> | 24.46               | 10.40  | 38.52 | 0.001  | 19.80                       | 5.09   | 34.51 | 0.009  | 23.90                   | 8.24   | 39.55 | 0.003  |
| <b>STANDARDIZED MENTAL COMPONENT</b> | 1.53                | -14.55 | 17.61 | 0.852  | -8.63                       | -25.02 | 7.77  | 0.301  | -17.43                  | -34.67 | -0.19 | 0.048  |
| <b>CAVI</b>                          |                     |        |       |        |                             |        |       |        |                         |        |       |        |
| STANDARDIZED PHYSICAL FUNCTION       | 1.34                | 0.42   | 2.26  | 0.004  | 1.97                        | 0.87   | 3.08  | <0.001 | 1.96                    | 0.79   | 3.13  | 0.001  |
| STANDARDIZED ROLE PHYSICAL           | 1.51                | 0.57   | 2.45  | 0.002  | 1.39                        | 0.26   | 2.53  | 0.017  | 1.05                    | -0.16  | 2.26  | 0.087  |
| STANDARDIZED BODILY PAIN             | 2.02                | 0.83   | 3.21  | 0.001  | 1.40                        | 0.00   | 2.81  | 0.050  | 1.11                    | -0.43  | 2.65  | 0.158  |
| STANDARDIZED GENERAL HEALTH          | 1.00                | 0.07   | 1.92  | 0.035  | 0.51                        | -0.62  | 1.63  | 0.378  | 0.50                    | -0.71  | 1.70  | 0.416  |
| STANDARDIZED VITALITY                | 0.56                | -0.60  | 1.73  | 0.341  | 0.17                        | -1.25  | 1.58  | 0.818  | -0.58                   | -2.07  | 0.92  | 0.449  |
| STANDARDIZED SOCIAL FUNCTIONING      | 1.01                | 0.00   | 2.02  | 0.051  | 0.01                        | -1.20  | 1.22  | 0.984  | -0.17                   | -1.49  | 1.14  | 0.798  |
| STANDARDIZED ROLE EMOTIONAL          | 0.81                | -0.20  | 1.82  | 0.115  | 0.14                        | -1.07  | 1.35  | 0.822  | -0.15                   | -1.47  | 1.17  | 0.826  |
| STANDARDIZED MENTAL HEALTH           | 1.57                | 0.49   | 2.64  | 0.004  | 0.49                        | -0.78  | 1.75  | 0.451  | 0.46                    | -0.89  | 1.80  | 0.504  |
| <b>STANDARDIZED PHYSICAL COMPON.</b> | 1.50                | 0.54   | 2.46  | 0.002  | 1.77                        | 0.61   | 2.93  | 0.003  | 1.59                    | 0.32   | 2.85  | 0.014  |
| <b>STANDARDIZED MENTAL COMPONENT</b> | 0.81                | -0.28  | 1.90  | 0.145  | -0.43                       | -1.73  | 0.87  | 0.513  | -0.72                   | -2.11  | 0.67  | 0.310  |

| b)                                   | Model 1: Unadjusted |       |       |       | Model 2: Minimally adjusted |       |      |       | Model 3: Fully adjusted |       |      |       |
|--------------------------------------|---------------------|-------|-------|-------|-----------------------------|-------|------|-------|-------------------------|-------|------|-------|
|                                      | B                   | CI95% |       | p     | B                           | CI95% |      | p     | B                       | CI95% |      | p     |
| <b>ba-PWV</b>                        |                     |       |       |       |                             |       |      |       |                         |       |      |       |
| STANDARDIZED PHYSICAL FUNCTION       | 0.12                | -0.28 | 0.52  | 0.549 | 0.24                        | -0.20 | 0.69 | 0.277 | 0.15                    | -0.34 | 0.64 | 0.542 |
| STANDARDIZED ROLE PHYSICAL           | 0.49                | 0.09  | 0.89  | 0.017 | 0.46                        | 0.01  | 0.91 | 0.043 | 0.24                    | -0.26 | 0.74 | 0.337 |
| STANDARDIZED BODILY PAIN             | 0.37                | -0.14 | 0.89  | 0.153 | 0.18                        | -0.37 | 0.74 | 0.515 | -0.06                   | -0.70 | 0.58 | 0.850 |
| STANDARDIZED GENERAL HEALTH          | -0.02               | -0.41 | 0.38  | 0.938 | -0.28                       | -0.72 | 0.17 | 0.222 | -0.33                   | -0.82 | 0.17 | 0.195 |
| STANDARDIZED VITALITY                | 0.05                | -0.45 | 0.54  | 0.853 | -0.08                       | -0.64 | 0.48 | 0.777 | -0.41                   | -1.02 | 0.21 | 0.195 |
| STANDARDIZED SOCIAL FUNCTIONING      | 0.28                | -0.15 | 0.71  | 0.197 | 0.00                        | -0.47 | 0.48 | 0.986 | -0.06                   | -0.60 | 0.48 | 0.823 |
| STANDARDIZED ROLE EMOTIONAL          | 0.19                | -0.24 | 0.62  | 0.374 | 0.02                        | -0.45 | 0.50 | 0.919 | -0.07                   | -0.61 | 0.47 | 0.794 |
| STANDARDIZED MENTAL HEALTH           | 0.49                | 0.03  | 0.95  | 0.036 | 0.23                        | -0.27 | 0.73 | 0.363 | 0.25                    | -0.31 | 0.80 | 0.381 |
| <b>STANDARDIZED PHYSICAL COMPON.</b> | 0.19                | -0.22 | 0.61  | 0.361 | 0.20                        | -0.27 | 0.66 | 0.401 | 0.00                    | -0.53 | 0.52 | 0.993 |
| <b>STANDARDIZED MENTAL COMPONENT</b> | 0.29                | -0.18 | 0.75  | 0.226 | -0.02                       | -0.53 | 0.49 | 0.933 | -0.08                   | -0.65 | 0.50 | 0.791 |
| <b>Aix_75</b>                        |                     |       |       |       |                             |       |      |       |                         |       |      |       |
| STANDARDIZED PHYSICAL FUNCTION       | -0.09               | -0.16 | -0.02 | 0.014 | -0.06                       | -0.14 | 0.02 | 0.134 | -0.08                   | -0.16 | 0.00 | 0.052 |
| STANDARDIZED ROLE PHYSICAL           | -0.04               | -0.12 | 0.03  | 0.240 | -0.03                       | -0.11 | 0.05 | 0.504 | -0.04                   | -0.13 | 0.04 | 0.301 |
| STANDARDIZED BODILY PAIN             | -0.08               | -0.17 | 0.01  | 0.099 | -0.04                       | -0.13 | 0.06 | 0.446 | -0.05                   | -0.16 | 0.06 | 0.341 |
| STANDARDIZED GENERAL HEALTH          | -0.02               | -0.09 | 0.05  | 0.582 | -0.03                       | -0.10 | 0.05 | 0.505 | -0.03                   | -0.11 | 0.06 | 0.521 |
| STANDARDIZED VITALITY                | 0.00                | -0.09 | 0.08  | 0.924 | 0.01                        | -0.09 | 0.11 | 0.840 | 0.03                    | -0.07 | 0.13 | 0.590 |
| STANDARDIZED SOCIAL FUNCTIONING      | -0.01               | -0.08 | 0.07  | 0.887 | 0.00                        | -0.08 | 0.09 | 0.943 | 0.01                    | -0.08 | 0.10 | 0.865 |
| STANDARDIZED ROLE EMOTIONAL          | -0.01               | -0.09 | 0.06  | 0.722 | 0.01                        | -0.08 | 0.09 | 0.891 | 0.01                    | -0.08 | 0.10 | 0.890 |
| STANDARDIZED MENTAL HEALTH           | -0.01               | -0.09 | 0.07  | 0.834 | 0.02                        | -0.06 | 0.11 | 0.575 | 0.05                    | -0.04 | 0.14 | 0.293 |
| <b>STANDARDIZED PHYSICAL COMPON.</b> | -0.08               | -0.15 | 0.00  | 0.039 | -0.06                       | -0.14 | 0.02 | 0.151 | -0.08                   | -0.17 | 0.00 | 0.059 |
| <b>STANDARDIZED MENTAL COMPONENT</b> | 0.02                | -0.06 | 0.11  | 0.625 | 0.04                        | -0.05 | 0.13 | 0.395 | 0.06                    | -0.03 | 0.16 | 0.183 |

Multiple linear regression analysis by Multivariate General Linear model (GLM). Dependent variables: standardized physical function, standardized role physical, standardized bodily pain, standardized general health, standardized vitality, standardized social functioning, standardized role emotional, standardized mental health and Standardized Physical and Mental Component.

Independent Variables: Ankle brachial index (ABI), Cardio Ankle Vascular index (CAVI), Brachial-Ankle Pulse Wave Velocity (ba-PWV) and Augmentation index (Alx\_75).

Model 1: Unadjusted; Model 2: Adjusted for age and gender; Model 3: Adjusted for age, gender, current smoker, alcohol consumption in gr/week, physical exercise (METs-min 14 days), diet quality index, mean blood pressure, atherogenic index (CT/HDL-C), HbA1c and antihypertensive and lipid-lowering drugs.
